# Supplementary material
Source: Elsevier journal article supplement (https://www.sciencedirect.com/science/article/pii/S0210569119300737)
Supplement: mmc1 [file S0210569119300737:mmc1.pdf]

## Supplementary material

### *Comorbidities definition:*

Comorbidities have been defined following the classic Charlson Comorbidity Index (CCI) (1):

- DM free of complications
- DM with complications

Diabetes with retinopathy, neuropathy or nephropathy

- Cardiac disease

Cardiac disease includes myocardial infarction and congestive heart failure

- Lung disease

Lung disease includes patients who had dyspnea with moderate/slight activity or at rest

- Liver disease

Liver disease includes mild and moderate-severe liver disease.

Mild liver disease: chronic hepatitis or cirrhosis without portal hypertension

Moderate-severe liver disease: cirrhosis with portal hypertension (with or without history of variceal bleeding)

- Renal disease

Renal disease includes patients on dialysis or who had a kidney transplant

- Peripheral vascular disease

Peripheral vascular disease includes patients with intermittent claudication, those who had a bypass for arterial insufficiency, those with an untreated thoracic or abdominal aneurysm or those with acute arterial insufficiency

- Cerebrovascular disease

Cerebrovascular disease includes patients with a history of a cerebrovascular accident with minor or any neurological symptom.

- Hemiplegia
- Dementia

Patients with chronic cognitive deficit

- Connective tissue disease

Connective tissue disease includes patients with systemic lupus erythematosus, polymyositis, mixed connective tissue disease, polymyalgia rheumatica and rheumatoid arthritis

- Ulcer disease

Ulcer disease includes patients who requires treatment for ulcer disease or history of bleeding from ulcers

- Metastatic solid tumor

Metastatic solid tumor includes patients with metastatic solid tumors

- Any tumor

“Any tumor” includes patients with solid tumors without documented metastases, but treated in the last five years

- Leukemia
- Lymphoma
- AIDS

**Table e1. Comorbidities**

| <b>Comorbidities</b>                 | <b>n</b> | <b>%</b> |
|--------------------------------------|----------|----------|
| <i>DM free of complications</i>      | 10       | 3.5      |
| <i>DM with complications</i>         | 2        | 0.7      |
| <i>Cardiac disease</i>               | 13       | 4.6      |
| <i>Lung disease</i>                  | 25       | 8.8      |
| <i>Liver disease</i>                 | 185      | 65.4     |
| <i>Moderate-Severe liver disease</i> | 37       | 13.1     |
| <i>Renal disease</i>                 | 5        | 1.8      |
| <i>Peripheral vascular disease</i>   | 0        | 0        |
| <i>Cerebrovascular disease</i>       | 4        | 1.4      |
| <i>Hemiplegia</i>                    | 0        | 0        |
| <i>Dementia</i>                      | 1        | 0.4      |
| <i>Connective tissue disease</i>     | 4        | 1.4      |
| <i>Ulcer disease</i>                 | 0        | 0        |
| <i>Metastatic solid tumor</i>        | 0        | 0        |
| <i>Any tumor</i>                     | 10       | 3.5      |
| <i>Leukemia</i>                      | 0        | 0        |
| <i>Lymphoma</i>                      | 8        | 2.8      |
| <i>AIDS</i>                          | 195      | 68.9     |

*Superinfection definition:*

Superinfection was defined as any infection acquired during ICU stay

*Diagnosis at admission:*

- Severe sepsis/Septic shock

The second definition of sepsis was used to define severe sepsis/septic shock

- Cardiac

Cardiac diagnosis includes: acute coronary syndrome, acute aortic syndrome, arrhythmia, cardiac arrest and heart failure

- Trauma

Admission from trauma includes brain trauma, thoracic trauma, abdominal trauma, burns and combination of this

- Neurological

Neurological diagnosis includes ischemic or hemorrhagic stroke and subarachnoid hemorrhage.

- Postoperative control

Postoperative control includes patients admitted after scheduled surgery

- Digestive

Digestive diagnosis includes digestive bleeding, acute pancreatitis, acute liver failure, and acute on chronic liver failure.

- Respiratory

Respiratory diagnosis includes exacerbation of chronic obstructive pulmonary diseases or asthma, pulmonary embolism or hemoptysis.

- Others

“Others” diagnosis category includes all diagnosis not included in previous categories (intoxication by drugs of abuse or pharmacological, withdrawal syndrome, epileptic status, anaphylaxis, diabetes decompensation, ...)

**Table e2. Diagnosis at admission**

| <b>Diagnosis</b>                  | <b><i>n</i></b> | <b>%</b> |
|-----------------------------------|-----------------|----------|
| <i>Severe sepsis/Septic shock</i> | 140             | 49.5     |
| <i>Cardiac</i>                    | 55              | 19.4     |
| <i>Trauma</i>                     | 19              | 6.7      |
| <i>Neurological</i>               | 11              | 3.9      |
| <i>Digestive</i>                  | 17              | 6.0      |
| <i>Respiratory</i>                | 5               | 1.8      |
| <i>Postoperative control</i>      | 3               | 1.1      |
| <i>Others</i>                     | 33              | 11.6     |

**Table e3. HAART-related complications**

| <b>Complication</b>                         | <b><i>n</i></b> | <b>% over patients receiving HAART (<i>n</i>=111)</b> |
|---------------------------------------------|-----------------|-------------------------------------------------------|
| Immune reconstitution inflammatory syndrome | 3               | 2.7                                                   |
| Liver toxicity                              | 2               | 1.8                                                   |
| Lactic acidosis                             | 1               | 0.9                                                   |
| Weakness                                    | 1               | 0.9                                                   |
| Hyperlipidemia                              | 1               | 0.9                                                   |
| Skin reaction                               | 1               | 0.9                                                   |
| Pancytopenia                                | 1               | 0.9                                                   |
| Total                                       | 10              | 9                                                     |

1. Charlson ME, Pompei P, Ales KL, MacKenzie CR. A new method of classifying prognostic comorbidity in longitudinal studies: development and validation. J Chronic Dis. 1987;40(5):373-83.
